# Supplementary material
Source: PubMed Central journal article supplement (PMC2492493)
Supplement: 0711666105_0711666105SI.pdf [file 0711666105_0711666105SI.pdf]

# Supporting Information

Miccio *et al.* 10.1073/pnas.0711666105

## SI Materials and Methods

**Protein Analysis.** Globin polypeptide chain composition was determined by HPLC as described (1). Hemoglobins in peripheral blood collected from transplanted mice were resolved by cellulose acetate electrophoresis as previously described (2).

**Antibody Staining for FACS Analysis and Sorting.** RBCs were fixed in 0.05% glutaraldehyde for 10 min at room temperature, washed once with PBS, and permeabilized in 0.1% Triton X-100. Cells were incubated with anti-CD16 antibody (PharMingen) and 1% FBS (FBS) to block unspecific binding, stained with

phycoerythrin (PE)-conjugated anti-human  $\beta$ -globin antibody (SC-21757, Santa Cruz Biotechnology), and analyzed by FACScan employing the Cell Quest System (Becton Dickinson). Splenic and BM cells were incubated with anti-CD16 antibody and 1% FBS, stained with a PE-conjugated anti-mouse Ter119 antibody (PharMingen), and analyzed by FACScan. To purify Ter119<sup>+</sup> cells, BM cells were stained with PE-conjugated anti-mouse Ter119 antibody, magnetically labeled with anti-PE Microbeads (Miltenyi Biotec), and separated by using the Mini MACS separator (Miltenyi Biotec).

1. Schroeder WA, Shelton JB, Shelton JR, Huynh V, Teplow DB (1985) High performance liquid chromatographic separation of the globin chains of non-human hemoglobins. *Hemoglobin* 9:461–482.
2. May C, *et al.* (2000) Therapeutic haemoglobin synthesis in beta-thalassaemic mice expressing lentivirus-encoded human beta-globin. *Nature* 406:82–86.

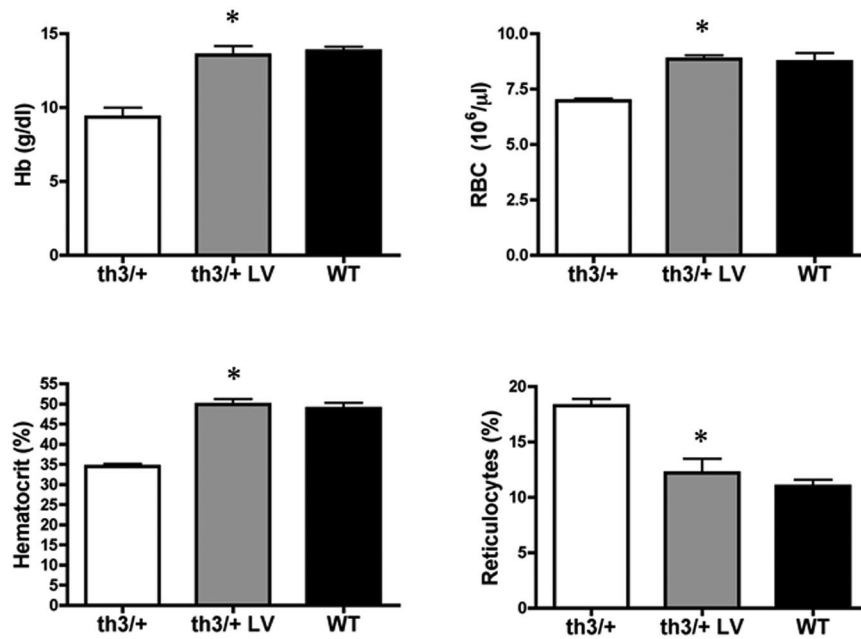

**Fig. S1.** Correction of hematological parameters in secondary recipients transplanted with transduced BM. Hemoglobin (Hb) concentration, RBC count, hematocrit, and percentages of reticulocytes in peripheral blood of secondary recipients transplanted with HSCs from primary recipients of mock-transduced *th3/+* (white column;  $n = 4$ ), normal (WT; black column;  $n = 3$ ), and transduced *th3/+* BM cells (*th3/+* LV; gray column;  $n = 5$ ), were measured 6 months after BM transplantation. Data represent the mean values and SEM for each group of animals. Hematological parameters are significantly different in recipients transplanted with transduced HSCs vs. control *th3/+* mice (Hb:  $P < 0.05$ ; RBC count:  $P < 0.01$ ; hematocrit:  $P < 0.01$ ; reticulocyte counts:  $P < 0.05$ ). No statistically significant differences were found compared with mice transplanted with normal cells.

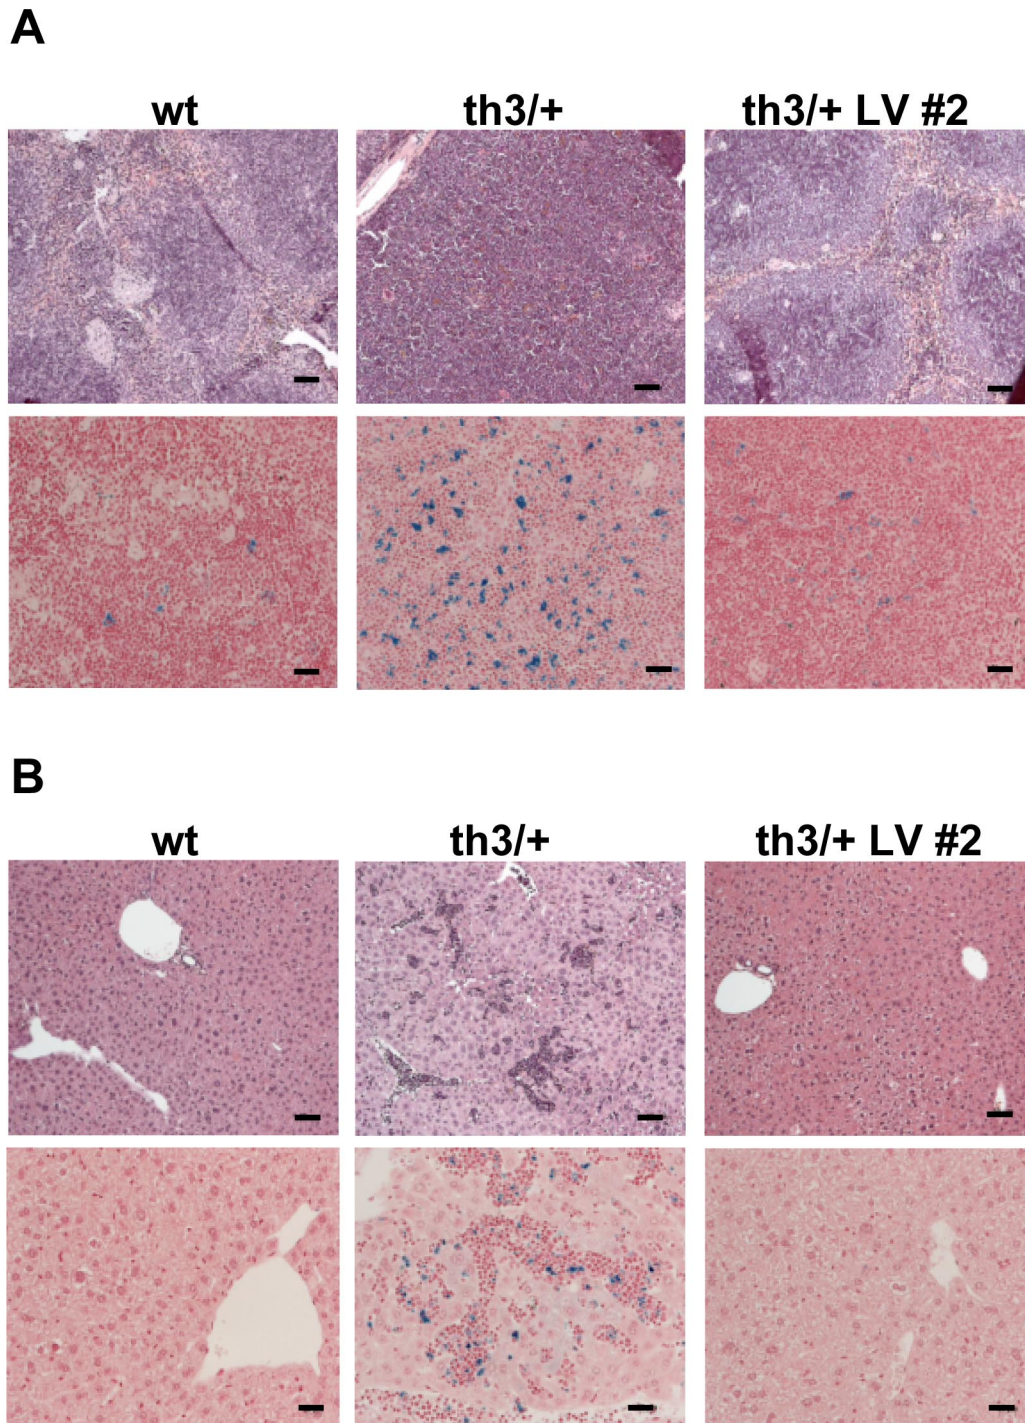

**Fig. S2.** Correction of spleen and liver pathology in recipients of transduced HSCs. (A) (Upper) H&E staining of splenic sections of mice transplanted with mock-transduced normal (WT), *th3/+*, and transduced *th3/+* cells (*th3/+* LV #2). Treated animals show a restoration of splenic architecture comparable to that of normal controls. (Original magnification  $\times 10$ .) (Lower) Determination of the iron deposition extension (Perls staining) in splenic sections. *th3/+* controls displayed numerous and large iron particles, whereas only trace amounts of iron, comparable to normal, were found in treated mice. (Original magnification  $\times 20$ .) (B) (Upper) EMH determination (H&E staining) in liver sections. Many foci of EMH were distinguishable in *th3/+* controls. Conversely, no evidence of EMH was found in recipients transplanted with transduced HSCs. (Lower) Absence of iron deposition in the liver of mice transplanted with transduced *th3/+* cells. Large iron deposits can be readily detected in *th3/+* control mice. (Original magnification for all  $\times 20$ .)

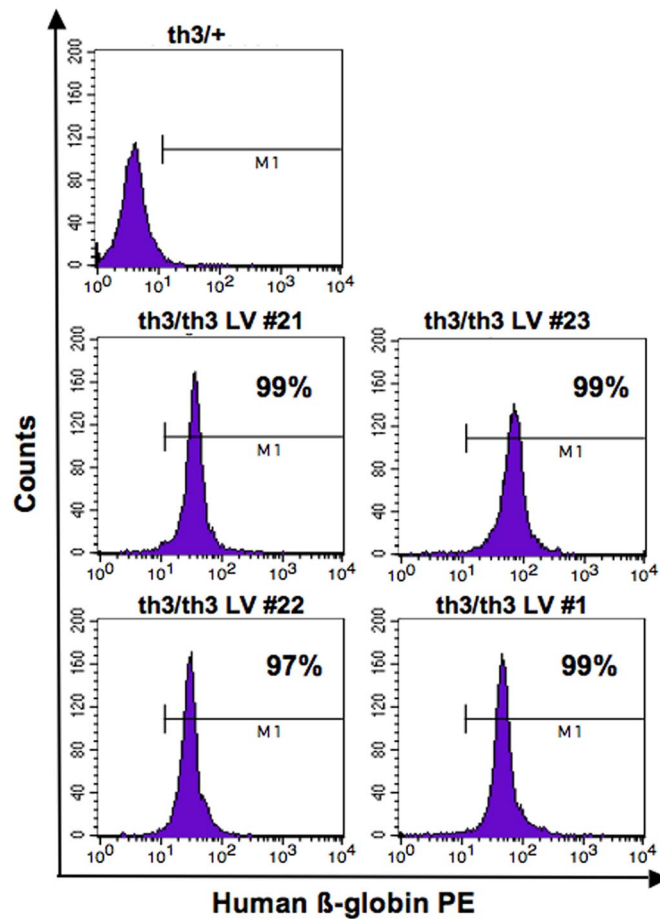

**Fig. S3.** GLOBE LV-derived  $\beta$ -globin expression in *th3/th3* hematopoietic chimeras. FACS analysis of peripheral blood samples collected 6 months after transplantation from mice transplanted with transduced *th3/th3* FLCs (*th3/th3* LV mice #21, #23, #22, and #1) and control mice transplanted with mock-transduced *th3/+* cells. RBCs were stained by using an antibody that specifically recognizes the human  $\beta$ -globin protein and were analyzed by flow cytometry.



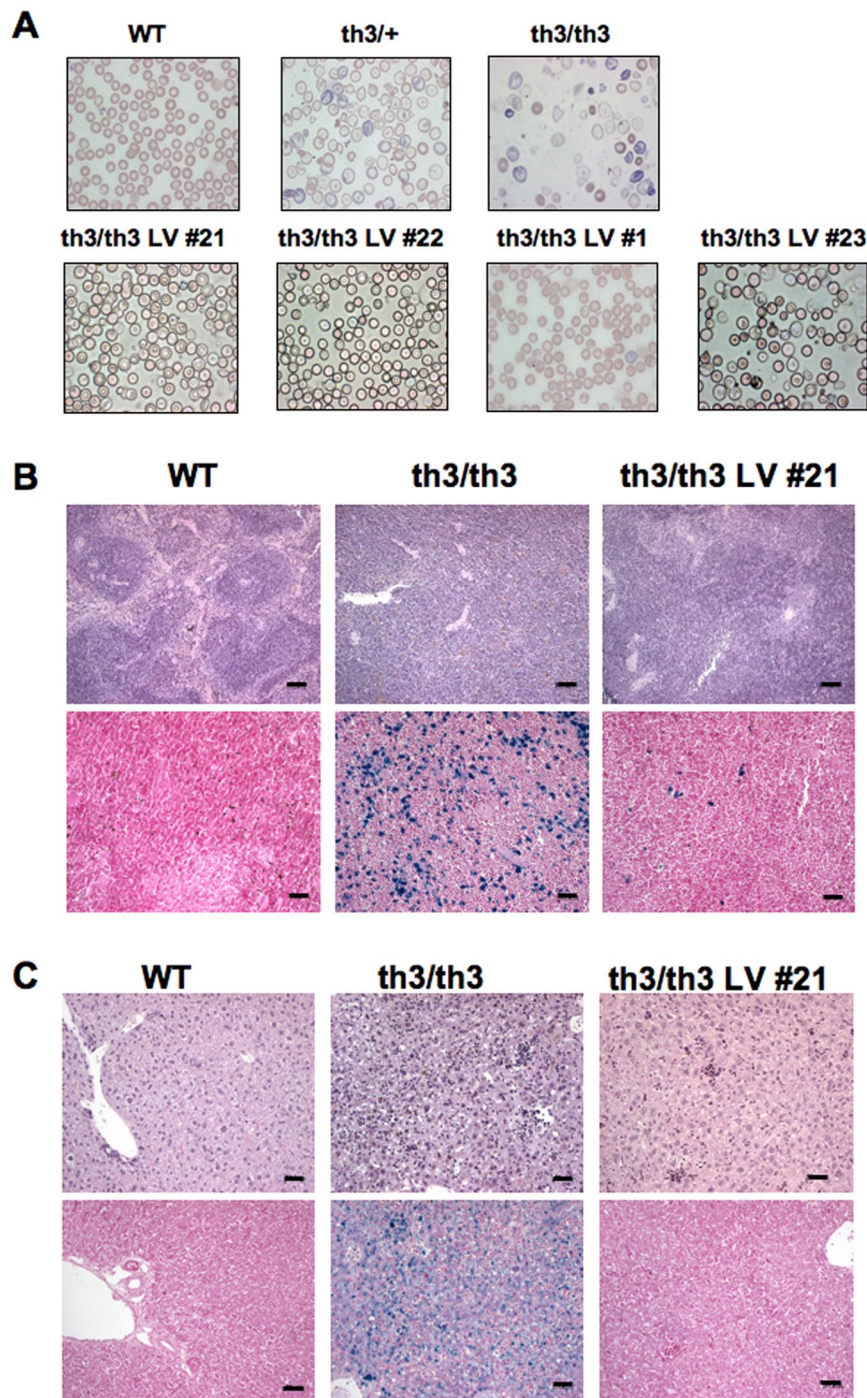

**Fig. S4.** Amelioration of RBC morphology and correction of organ pathology in long-term *th3/th3* chimeras. (A) May–Grunwald/Giemsa staining of blood smears from mice transplanted with mock-transduced normal (WT), *th3/+*, *th3/th3*, and transduced *th3/th3* (*th3/th3* GLOBE) cells was performed 7–12 months after transplantation except for mice transplanted with mock-transduced *th3/th3* FLCs, which were killed between 30 and 80 days after transplantation when profoundly anemic. Abnormal anisocytosis and poikilocytosis were strongly ameliorated in recipients of transduced FLCs. (Original magnification  $\times 40$ .) (B) (Upper) H&E staining of splenic sections of mice transplanted with mock-transduced normal, *th3/th3*, and transduced *th3/th3* FLCs (*th3/th3* LV #21). Splenic red pulp was highly expanded in *th3/th3* controls, whereas treated animals showed restoration of splenic architecture. (Original magnification  $\times 10$ .) (Lower) Determination of the iron deposition extension (Perls staining) in the spleen of mice transplanted with mock-transduced WT, *th3/th3*, and transduced *th3/th3* FLCs (*th3/th3* LV #21). Mice transplanted with *th3/th3* cells displayed high levels of iron deposition, while those receiving transduced HSCs showed reduced numbers of iron deposits. (Bars: 100  $\mu\text{m}$ ; original magnification  $\times 20$ .) (C) (Upper) EMH determination (H&E staining) in liver sections of mice transplanted with mock-transduced normal, *th3/th3*, and transduced *th3/th3* cells (*th3/th3* LV #21). The liver of mice transplanted with *th3/th3* FLCs showed abundant foci of EMH. Conversely, a low level of EMH was found in recipients of transduced HSCs. (Lower) Reduction of iron deposition (Perls staining) in the liver of mice transplanted with transduced *th3/th3* cells (*th3/th3* LV #21). (Original magnification  $\times 10$ .)

**Table S1. Correction of thalassemic phenotype in mice transplanted with transduced BM HSCs**

| Mouse no.    | % huβ <sup>+</sup> RBCs | % huβ/mα | Hb, g/dl     | RBCs<br>×10 <sup>6</sup> /μl | Hct, % | % Reticulocytes | % BM                         |                                         | Splenic<br>iron deposits | Liver<br>EMH | Liver<br>iron deposits | VCN  |
|--------------|-------------------------|----------|--------------|------------------------------|--------|-----------------|------------------------------|-----------------------------------------|--------------------------|--------------|------------------------|------|
|              |                         |          |              |                              |        |                 | Ter119 <sup>+</sup><br>cells | Splenic<br>Ter119 <sup>+</sup><br>cells |                          |              |                        |      |
| 14           | 64                      | ND       | 9.69         | 7.72                         | 37     | 18.9            | 55                           | 26                                      | 3                        | 1            | 2                      | 0.23 |
| 19           | 99                      | 19       | 12.48        | 8.40                         | 42     | 12.3            | 46                           | 8                                       | 2                        | 0            | 1                      | 0.91 |
| 21           | 95                      | 19       | 14.01        | 10.99                        | 53     | 7.7             | 46                           | 8                                       | 2                        | 0            | 0                      | 0.74 |
| 4            | 99                      | 23       | 12.30        | 10.16                        | 48     | 11.8            | 42                           | 11                                      | 1                        | 0            | 0                      | 0.55 |
| 6            | 86                      | 14       | 9.40         | 7.51                         | 36     | 20.8            | 48                           | 21                                      | 2                        | 0            | 2                      | 0.27 |
| 5            | 99                      | 37       | 13.86        | 9.99                         | 51     | 11.8            | 37                           | 5                                       | 3                        | 0            | 0                      | 0.83 |
| 2            | 95                      | 30       | 13.20        | 9.30                         | 48     | 4.1             | 26                           | 3                                       | 1                        | 0            | 0                      | 2.20 |
| 55           | 96                      | ND       | 11.65        | 9.15                         | 43     | 15.5            | 42                           | 10                                      | 1                        | 0            | 0                      | 0.55 |
| <i>th3/+</i> | NA                      | NA       | 8.03 ± 0.39  | 5.89 ± 0.17                  | 29 ± 1 | 25.8 ± 2.0      | 60 ± 3                       | 47 ± 8                                  | 2–3                      | 0–3          | 0–3                    | NA   |
| WT           | NA                      | NA       | 13.01 ± 0.87 | 8.97 ± 0.29                  | 46 ± 2 | 5.6 ± 0.7       | 37 ± 2                       | 6 ± 2                                   | 0–2                      | 0–1          | 0–1                    | NA   |

NA, not applicable; ND, not determined.

**Table S2. Correction of organ pathology in *th3/+* mice transplanted with transduced BM cells**

| Mice*                           | % BM Ter119 <sup>+</sup> cells <sup>†</sup> | % Splenic Ter119 <sup>+</sup> cells <sup>†</sup> | Splenic iron deposits <sup>‡</sup> | Liver EMH <sup>§</sup> | Liver iron deposits <sup>‡</sup> |
|---------------------------------|---------------------------------------------|--------------------------------------------------|------------------------------------|------------------------|----------------------------------|
| WT ( <i>n</i> = 5)              | 37.13 ± 1.78                                | 5.88 ± 1.61                                      | 0–2                                | 0–1                    | 0–1                              |
| <i>th3/+</i> ( <i>n</i> = 5)    | 60. ± 2.9                                   | 47.13 ± 8                                        | 2–3                                | 0–3                    | 0–3                              |
| <i>th3/+</i> LV ( <i>n</i> = 8) | 43.5 ± 2.92                                 | 11.50 ± 2.81                                     | 1–3                                | 0–1                    | 0–2                              |

\*Irradiated mice were transplanted with mock-transduced normal (WT) or *th3/+* cells, and with GLOBE-transduced (*th3/+* LV) cells, respectively.

<sup>†</sup>percentage of Ter119<sup>+</sup> cells, as determined by FACS staining, after *in silico* gating on mononucleated cells ( $P = 0.003$  *th3/+* vs. *th3/+* GLOBE;  $P > 0.05$  WT vs. *th3/+* LV)

<sup>‡</sup>The amount of iron deposition was scored semiquantitatively on a scale of 0 (no iron present) to 3 (maximum amount of iron identified in the organ).

<sup>§</sup>The extent of EMH was evaluated semiquantitatively on a scale of 0 (no EMH present) to 3 (maximum extent of EMH identified in the organ).

**Table S3. List of proviral integration sites**

| Mouse no.                                                               | Chromosomal band | Target gene   | Location   | RefSeq no.     | Biological function                                              |
|-------------------------------------------------------------------------|------------------|---------------|------------|----------------|------------------------------------------------------------------|
| Vector: GLOBE; Target: BM cells from the <i>th3/+</i> transplanted mice |                  |               |            |                |                                                                  |
| 4                                                                       | chr8 qE1         | Usp10         | intron 1   | NM.009462.1    | ubiquitin specific peptidase 10                                  |
|                                                                         | chrX qA5         | Hs6st2        | intron 1   | NM.015819.2    | heparan sulfate 6-O-sulfotransferase 2                           |
| 5                                                                       | chr9 qB          | Neo 1         | intron 7   | NM.008684.1    | neogenin                                                         |
|                                                                         | chr9 qE1         |               | intergenic |                |                                                                  |
|                                                                         | chr16 qC3.1      |               | intergenic |                |                                                                  |
|                                                                         | chrX qF4         |               | intergenic |                |                                                                  |
| 6                                                                       | chr5 qE1         |               | intergenic |                |                                                                  |
|                                                                         | chr10 qB5.1      | D10Ucla1      | intron 2   | NM.178606.2    | DNA segment, Chr 10, University of California at Los Angeles 1   |
|                                                                         | chr12 qE1        |               | intergenic |                |                                                                  |
|                                                                         | chr16 qA1        | Fgd4          | intron 1   | NM.139232.1    | FYVE RhoGEF and PH domain containing 4 isoform                   |
| 19                                                                      | chrX qE3         | Timm8a        | downstream | NM.013898.1    | translocase of inner mitochondrial membrane 8                    |
|                                                                         | chr1 qD          |               | intergenic |                |                                                                  |
|                                                                         | chr12 qC1        | Lfn5          | downstream | NM.178714.2    | leucine rich repeat and fibronectin type III domain containing 5 |
|                                                                         | chr17 qB1        | 9130008F23Rik | exon 2     | NM.027834.1    | RIKEN cDNA 9130008F23 gene                                       |
|                                                                         | chr18 qB3        |               | intergenic |                |                                                                  |
| 2                                                                       | chr3 qG1         | Usp53         | intron 13  | NM.133857.1    | ubiquitin specific peptidase 53                                  |
|                                                                         | chr6 qA1         | Foxp2         | upstream   | NM.053242.4    | forkhead box P2                                                  |
|                                                                         | chr9 qA1         | Alkbh8        | intron 2   | NM.026303.1    | alkB, alkylation repair homolog 8 (E. coli)                      |
|                                                                         | chr9 qF4         | Snrk          | upstream   | NM.133741.1    | SNF related kinase                                               |
|                                                                         | chrX qD          | P2ry10        | intron 2   | NM.172435.2    | purinergic receptor P2Y, G-protein coupled 10                    |
| 55                                                                      | chr2 qC1.1       |               | intergenic |                |                                                                  |
|                                                                         | chr2 qH3         | Eya2          | intron 1   | NM.010165.2    | eyes absent 2 homolog                                            |
|                                                                         | chr3 qG1         | Ndst4         | intron 4   | NM.022565.1    | N-deacetylase/N-sulfotransferase                                 |
|                                                                         | chr3 qE3         | Golph4        | downstream | NM.175193.4    | golgi phosphoprotein 4                                           |
|                                                                         | chr5 qB3         |               | intergenic |                |                                                                  |
|                                                                         | chr6 qA1         |               | intergenic |                |                                                                  |
|                                                                         | chr6 qA1         | Peg10         | intron 1   | NM.130877.2    | paternally expressed 10 isoform RF1/RF2                          |
|                                                                         | chr6 qA2         |               | intergenic |                |                                                                  |
|                                                                         | chr7 qE3         | Gvin1         | intron 1   | NM.001039160.2 | very large inducible GTPase 1                                    |
|                                                                         | chr8 qB3.1       | Tll1          | intron 6   | NM.009390.2    | tolloid-like                                                     |
|                                                                         | chr10 qD2        |               | intergenic |                |                                                                  |
|                                                                         | chr11 qA1        | Sfi1          | intron 20  | NM.030207.2    | Sfi1 homolog spindle assembly associated                         |
|                                                                         | chr18 qA2        |               | intergenic |                |                                                                  |
| 21                                                                      | chr1 qA2         | Mybl1         | intron 4   | NM.008651.2    | myeloblastosis oncogene-like 1                                   |
|                                                                         | chr1 qB          |               | intergenic |                |                                                                  |
|                                                                         | chr3 qA3         |               | intergenic |                |                                                                  |
|                                                                         | chr10 qB4        | Pkib          | intron 2   | NM.008863.3    | cAMP-dependent protein kinase inhibitor beta                     |
|                                                                         | chr10 qD2        | Cpsf6         | intron 3   | NM.001013391.1 | cleavage and polyadenylation specific factor 6                   |
|                                                                         | chr11 qA5        | Mat2b         | intron 1   | NM.134017.1    | methionine adenosyltransferase II beta                           |
|                                                                         | chr12 qD3 (1)    |               | intergenic |                |                                                                  |
|                                                                         | chr12 qD3 (2)    |               | intergenic |                |                                                                  |
|                                                                         | chr15 qB3.2      |               | intergenic |                |                                                                  |
|                                                                         | chr19 qA         | Ehd1          | intron 2   | NM.010119.3    | EH-domain containing 1                                           |
|                                                                         | chrX qF5         | Gla2          | intron 4   | NM.183427.2    | glycine receptor, alpha 2 subunit                                |
| 14                                                                      | chr2 qB          | Dennd1a       | intron 2   | NM.146122.2    | DENN/MADD domain containing 1A                                   |
|                                                                         | chr2 q C1.1      |               | intergenic |                |                                                                  |
|                                                                         | chr2 qC1.3       |               | intergenic |                |                                                                  |
|                                                                         | chr3 qA2         |               | intergenic |                |                                                                  |
|                                                                         | chr4 qA1         | Gem           | 3'UTR      | NM.010276.1    | GTP binding protein(gene overexpressed in skeletal muscle)       |
|                                                                         | chr6 qA1         |               | intergenic |                |                                                                  |
|                                                                         | chr7 qD3         | Rab38         | intron 1   | NM.028238      | Rab38, member of RAS oncogene family                             |
|                                                                         | chr8 qB3.1       |               | intergenic |                |                                                                  |
|                                                                         | chr9 qA1         | Dync2h1       | exon>10    | NM.029851.2    | dynein cytoplasmic heavy chain 2                                 |
|                                                                         | chr10 qD1        | Osbp18        | intron 1   | NM.001003717.1 | oxysterol-binding protein-like protein 8 isoform                 |
|                                                                         | chr12 qC3        | Ppp2r5e       | intron 3   | NM.012024.2    | epsilon isoform of regulatory subunit B56                        |
|                                                                         | chr15 qA1        | Lmbrd2        | intron 4   | NM.177178.3    | LMBR1 domain containing 2                                        |
|                                                                         | chr15 qF3        | Nckap1l       | intron 21  | NM.153505.2    | NCK associated protein 1 like                                    |
|                                                                         | chr16 qA1        | 2310008H04Rik | intron 1   | NM.146068      | hypothetical protein LOC224008                                   |
|                                                                         | chr17 qE1.1      | Arhgap28      | intron 1   | NM.172964      | Rho GTPase activating protein 28                                 |



| Mouse no.                                                                               | Chromosomal band | Target gene   | Location   | RefSeq no.     | Biological function                                              |
|-----------------------------------------------------------------------------------------|------------------|---------------|------------|----------------|------------------------------------------------------------------|
| Vector: GLOBE; Target: Ter119 <sup>+</sup> BM cells from <i>th3</i> / <sup>+</sup> mice |                  |               |            |                |                                                                  |
| 4                                                                                       | chr8 qE1         | Usp10         | intron 1   | NM.009462.1    | ubiquitin specific peptidase 10                                  |
|                                                                                         | chrX qA5         | Hs6st2        | intron 1   | NM.015819.2    | heparan sulfate 6-O-sulfotransferase 2                           |
| 5                                                                                       | chr16 qC3.1      |               | intergenic |                |                                                                  |
|                                                                                         | chrX qF4         |               | intergenic |                |                                                                  |
| 6                                                                                       | chr5 qE1         |               | intergenic |                |                                                                  |
|                                                                                         | chr12 qE1        |               | intergenic |                |                                                                  |
| 19                                                                                      | chr12 qC1        | Lrfn5         | downstream | NM.178714.2    | leucine rich repeat and fibronectin type III domain containing 5 |
|                                                                                         | chr17 qB1        | 9130008F23Rik | exon 2     | NM.027834.1    | RIKEN cDNA 9130008F23 gene                                       |
|                                                                                         | chr18 qB3        |               | intergenic |                |                                                                  |
| 2                                                                                       | chr3 qG1         | Usp53         | intron 13  | NM.133857.1    | ubiquitin specific peptidase 53                                  |
|                                                                                         | chr6 qA1         | Foxp2         | upstream   | NM.053242.4    | forkhead box P2                                                  |
|                                                                                         | chr9 qA1         | Alkbh8        | intron 2   | NM.026303.1    | alkB, alkylation repair homolog 8 (E. coli)                      |
|                                                                                         | chr9 qF4         | Snrk          | upstream   | NM.133741.1    | SNF related kinase                                               |
|                                                                                         | chrX qD          | P2ry10        | intron 2   | NM.172435.2    | purinergic receptor P2Y, G-protein coupled 10                    |
| 55                                                                                      | chr2 qC1.1       |               | intergenic |                |                                                                  |
|                                                                                         | chr3 qG1         | Ndst4         | intron 4   | NM.022565.1    | N-deacetylase/N-sulfotransferase                                 |
|                                                                                         | chr5 qB3         |               | intergenic |                |                                                                  |
|                                                                                         | chr6 qA1         |               | intergenic |                |                                                                  |
|                                                                                         | chr6 qA2         |               | intergenic |                |                                                                  |
|                                                                                         | chr10 qD2        |               | intergenic |                |                                                                  |
|                                                                                         | chr11 qA1        | Sfi1          | intron 20  | NM.030207.2    | Sfi1 homolog spindle assembly associated                         |
|                                                                                         | chr18 qA2        |               | intergenic |                |                                                                  |
| 21                                                                                      | chr1 qB          |               | intergenic |                |                                                                  |
|                                                                                         | chr3 qA3         |               | intergenic |                |                                                                  |
|                                                                                         | chr11 qA5        | Mat2b         | intron 1   | NM.134017.1    | methionine adenosyltransferase II beta                           |
|                                                                                         | chr12 qD3 (1)    |               | intergenic |                |                                                                  |
|                                                                                         | chr12 qD3 (2)    |               | intergenic |                |                                                                  |
|                                                                                         | chr15 qB3.2      |               | intergenic |                |                                                                  |
| 14                                                                                      | chr2 q C1.1      |               | intergenic |                |                                                                  |
|                                                                                         | chr6 qA1         |               | intergenic |                |                                                                  |
|                                                                                         | chr8 qB3.1       |               | intergenic |                |                                                                  |
|                                                                                         | chr9 qA1         | Dync2h1       | exon>10    | NM.029851.2    | dynein cytoplasmic heavy chain 2                                 |
|                                                                                         | chr15 qA1        | Lmbrd2        | intron 4   | NM.177178.3    | LMBR1 domain containing 2                                        |
|                                                                                         | chr15 qF3        | Nckap1l       | intron 21  | NM.153505.2    | NCK associated protein 1 like                                    |
|                                                                                         | chr17 qE1.1      | Arhgap28      | intron 1   | NM.172964      | Rho GTPase activating protein 28                                 |
| Vector: GLOBE; Target: Ter119 <sup>-</sup> BM cells from <i>th3</i> / <sup>+</sup> mice |                  |               |            |                |                                                                  |
| 4                                                                                       | chr8 qE1         | Usp10         | intron 1   | NM.009462.1    | ubiquitin specific peptidase 10                                  |
|                                                                                         | chrX qA5         | Hs6st2        | intron 1   | NM.015819.2    | heparan sulfate 6-O-sulfotransferase 2                           |
| 5                                                                                       | chr9 qB          | Neo 1         | intron 7   | NM.008684.1    | neogenin                                                         |
|                                                                                         | chr9 qE1         |               | intergenic |                |                                                                  |
| 6                                                                                       | chr5 qE1         |               | intergenic |                |                                                                  |
|                                                                                         | chr10 qB5.1      | D10Ucla1      | intron 2   | NM.178606.2    | DNA segment, Chr 10, University of California at Los Angeles 1   |
|                                                                                         | chr12 qE1        |               | intergenic |                |                                                                  |
|                                                                                         | chr16 qA1        | Fgd4          | intron 1   | NM.139232.1    | FYVE RhoGEF and PH domain containing 4 isoform                   |
|                                                                                         | chrX qE3         | Timm8a        | downstream | NM.013898.1    | translocase of inner mitochondrial membrane 8                    |
| 19                                                                                      | chr12 qC1        | Lrfn5         | downstream | NM.178714.2    | leucine rich repeat and fibronectin type III domain containing 5 |
|                                                                                         | chr17 qB1        | 9130008F23Rik | exon 2     | NM.027834.1    | RIKEN cDNA 9130008F23 gene                                       |
| 2                                                                                       | chr3 qG1         | Usp53         | intron 13  | NM.133857.1    | ubiquitin specific peptidase 53                                  |
|                                                                                         | chr6 qA1         | Foxp2         | upstream   | NM.053242.4    | forkhead box P2                                                  |
|                                                                                         | chr9 qA1         | Alkbh8        | intron 2   | NM.026303.1    | alkB, alkylation repair homolog 8 (E. coli)                      |
|                                                                                         | chr9 qF4         | Snrk          | upstream   | NM.133741.1    | SNF related kinase                                               |
|                                                                                         | chrX qD          | P2ry10        | intron 2   | NM.172435.2    | purinergic receptor P2Y, G-protein coupled 10                    |
| 55                                                                                      | chr2 qC1.1       |               | intergenic |                |                                                                  |
|                                                                                         | chr2 qH3         | Eya2          | intron 1   | NM.010165.2    | eyes absent 2 homolog                                            |
|                                                                                         | chr3 qG1         | Ndst4         | intron 4   | NM.022565.1    | N-deacetylase/N-sulfotransferase                                 |
|                                                                                         | chr3 qE3         | Golph4        | downstream | NM.175193.4    | Golgi phosphoprotein 4                                           |
|                                                                                         | chr6 qA1         |               | intergenic |                |                                                                  |
|                                                                                         | chr6 qA1         | Peg10         | intron 1   | NM.130877.2    | paternally expressed 10 isoform RF1/RF2                          |
|                                                                                         | chr7 qE3         | Gvin1         | intron 1   | NM.001039160.2 | very large inducible GTPase 1                                    |
|                                                                                         | chr8 qB3.1       | Tll1          | intron 6   | NM.009390.2    | tolloid-like                                                     |



| Mouse no.                                               | Chromosomal band | Target gene   | Location         | RefSeq no.     | Biological function                                                    |
|---------------------------------------------------------|------------------|---------------|------------------|----------------|------------------------------------------------------------------------|
|                                                         | chr14 qE2.3      | Ndfip2        | intron 1         | NM.029561.2    | Nedd4 family interacting protein 2                                     |
|                                                         | chr14 qE4        | Slitrk5       | downstream       | NM.029273.2    | SLIT and NTRK-like family member 5 isoform 1                           |
|                                                         | chr15 qA1        | 1110020G09Rik | intron 1         | NM.001040395.2 | hypothetical protein LOC68646                                          |
|                                                         | chr15 qD3        | Tssk5         | upstream         | NM.183099.2    | testis-specific serine kinase 5                                        |
|                                                         | chr16 qA1        | Gspt1         | intron 9         | NM.146066.1    | G1 to S phase transition 1                                             |
|                                                         | chr16 qA3        | Hira          | intron 14        | NM.010435.2    | histone cell cycle regulation defective homolog                        |
|                                                         | chr17 qA1        |               | intergenic       |                |                                                                        |
|                                                         | chr17 qA1        | Park2         | intron 1         | NM.016694.3    | parkin                                                                 |
|                                                         | chr17 qB3        | Supt3h        | intron 2         | NM.178652.2    | suppressor of Ty 3 homolog                                             |
|                                                         | chr17 qB5        | Crk           | intron 2         | NM.133656.2    | v-crk sarcoma virus CT10 oncogene homolog                              |
|                                                         | chr18 qA1        | Rock1         | intron 11        | NM.009071.2    | Rho-associated coiled-coil forming kinase 1                            |
|                                                         | chr18 qD3        |               | intergenic       |                |                                                                        |
|                                                         | chrX qA1.2       | Utx           | intron 2         | NM.009483.1    | ubiquitously transcribed tetratricopeptide                             |
|                                                         | chrX qA1.2       | Utx           | intron 9         | NM.009483.1    | ubiquitously transcribed tetratricopeptide                             |
|                                                         | chrX qF2         | Lrch2         | intron 8         | NM.001081173.1 | leucine-rich repeats and calponin homology (CH)                        |
|                                                         | chrX qF3         |               | intergenic       |                |                                                                        |
|                                                         | chrX qF5         | Gpm6b         | intron 1         | NM.023122.2    | glycoprotein m6b                                                       |
| Vector: LV-GFP; Target: BM cells from <i>th3/+</i> mice |                  |               |                  |                |                                                                        |
| 1                                                       | chr2 qB          | Ptges         | intron 2         | NM.022415.2    | prostaglandin E synthase                                               |
|                                                         | chr5 qA1         |               | intergenic       |                |                                                                        |
|                                                         | chr16 qC1.2      | Cldnd1        | 3' UTR           | NM.171826.2    | claudin domain containing 1                                            |
| 2                                                       | chr18 qA1        |               | intergenic       |                |                                                                        |
|                                                         | chr1 qA2         |               | intergenic       |                |                                                                        |
|                                                         | chr1 qH5         | Gpatc2        | intron 5         | NM.026367.3    | G patch domain containing 2                                            |
|                                                         | chr8 qA4         | Tusc3         | intron 5         | NM.030254.3    | tumor suppressor candidate 3                                           |
|                                                         | chr10 qB3        | Man1a         | intron 4         | NM.008548.2    | mannosidase alpha class 1A member 1                                    |
|                                                         | chr13 qC3        | Xrcc4         | intron 6         | NM.028012.1    | X-ray repair complementing defective repair in Chinese hamster cells 4 |
|                                                         | chr15 qB3.1      | Pgcp          | intron 3         | NM.018755.2    | plasma glutamate carboxypeptidase                                      |
|                                                         | chr18 qB3        | Arhgap26      | intron 1         | NM.175164.4    | Rho GTPase activating protein 26                                       |
|                                                         | chr19 qA         | 1200004M23Rik | downstream(27.7) | NM.026169.3    | FKSG44 homolog                                                         |
|                                                         | chrX qA1.1       |               | intergenic       |                |                                                                        |
| 3                                                       | chrX qB          | EG636104      | downstream(2.9)  | NM.001099307.1 | hypothetical protein LOC636104                                         |
|                                                         | chr3 qB          | Sclt1         | intron 9         | NM.001081411.1 | sodium channel associated protein 1                                    |
|                                                         | chr9 qE2         | Phip          | intron 3         | NM.001081216.1 | pleckstrin homology domain interacting protein                         |
|                                                         | chr12 qD3        | 4930534B04Rik | intron 18        | NM.181815.2    | hypothetical protein LOC75216                                          |
|                                                         | chr19 qC3        | Tmem20        | downstream (5.1) | NM.175507.3    | transmembrane protein 20                                               |
| 4                                                       | chr2 qB          | Arhgap15      | intron 8         | NM.153820.3    | Rho GTPase activating protein 15 isoform 1                             |
|                                                         | chr2 qH1         | Rbm39         | intron 4         | NM.133242.2    | RNA binding motif protein 39                                           |
| 5                                                       | chr13 qA3.1      |               | intergenic       |                |                                                                        |
|                                                         | chr13 qA3.3      | Gmfs          | intron 1         | NM.146041.2    | GDP-mannose 4,6-dehydratase                                            |
|                                                         | chr13 qD1        | Rnf180        | upstream         | NM.027934.2    | ring finger protein 180                                                |
| 6                                                       | chr2 qC1.1       | March7        | intron 1         | NM.020575.2    | membrane-associated ring finger (C3HC4) 7                              |
|                                                         | chr5 qA1         | Cacna2d1      | intron 3         | NM.009784.1    | calcium channel voltage-dependent alpha2/delta                         |
|                                                         | chr5 qE2         | Rchy1         | intron 4         | NM.026557.3    | androgen receptor N-terminal-interacting                               |
|                                                         | chr9 qA4         |               | intergenic       |                |                                                                        |
|                                                         | chr14 qE4        |               | intergenic       |                |                                                                        |

Columns indicate, from left to right: mouse number, chromosomal location of each integrated provirus, target gene symbol, RefSeq identifier no., and biological function of target genes. Integrations were distributed as inside, outside, or at a distance of <30 kb upstream or downstream from known genes (University of California Santa Cruz annotation).

**Table S4. List of genomic control sequences randomly cloned from a library of murine BM cells DNA**

| Chromosomal band | Target gene   | Location   | RefSeq no.     | Biological function                         |
|------------------|---------------|------------|----------------|---------------------------------------------|
| chr1 qA5         | B3gat2        | intron 1   | NM_172124.2    | galactosylgalactosylxylosylprotein          |
| chr1 qC1.1       | Gulp1         | intron 1   | NM_027506.2    | PTB domain adaptor protein CED-6 isoform 1  |
| chr1 qC3         | Spag16        | intron 1   | NM_029160.2    | sperm associated antigen 16 isoform 1       |
| chr1 qD          |               | intergenic |                |                                             |
| chr1 qE1.2       |               | intergenic |                |                                             |
| chr1 qE2.1       | Rnf152        | intron 1   | NM_178779.2    | ring finger protein 152                     |
| chr1 qH4         | Akt3          | intron 1   | NM_011785.2    | thymoma viral proto-oncogene 3              |
| chr2 qC1.1       | Gpd2          | downstream | NM_010274.2    | glycerol phosphate dehydrogenase 2          |
| chr2 qC1.1       |               | intergenic |                |                                             |
| chr2 qE1         |               | intergenic |                |                                             |
| chr2 qE1         |               | intergenic |                |                                             |
| chr2 qE3         |               | intergenic |                |                                             |
| chr2 qE3         |               | intergenic |                |                                             |
| chr2 qF3         |               | intergenic |                |                                             |
| chr2 qH4         | Ctsz          | intron 3   | NM_022325.3    | cathepsin Z preproprotein                   |
| chr2 qH4         | Cdh4          | intron 1   | NM_009867.1    | cadherin 4                                  |
| chr3 qB          |               | intergenic |                |                                             |
| chr3 qC          | Foxo1         | intron 1   | NM_019739.2    | forkhead box O1a                            |
| chr3 qE3         |               | intergenic |                |                                             |
| chr3 qF1         | D930015E06Rik | upstream   | NM_172681.3    | hypothetical protein LOC229473              |
| chr4 qA3         |               | intergenic |                |                                             |
| chr4 qA3         |               | intergenic |                |                                             |
| chr4 qA5         |               | intergenic |                |                                             |
| chr4 qB1         |               | intergenic |                |                                             |
| chr4 qB2         |               | intergenic |                |                                             |
| chr4 qC3         |               | intergenic |                |                                             |
| chr4 qC6         |               | intergenic |                |                                             |
| chr4 qD2.1       | BC057371      | intron 1   | NM_177572.3    | hypothetical protein LOC194237              |
| chr5 qA3         | Gbx1          | intron 1   | NM_015739.2    | gastrulation brain homeobox 1               |
| chr5 qE1         |               | intergenic |                |                                             |
| chr5 qG3         | Kl            | intron 3   | NM_013823.1    | klotho                                      |
| chr6 qD1         |               | intergenic |                |                                             |
| chr7 qE1         | Gab2          | intron 1   | NM_010248.1    | growth factor receptor bound protein        |
| chr7 qF1         | Acsm3         | intron 11  | NM_212441.2    | SA hypertension-associated homolog          |
| chr8 qB3.1       |               | intergenic |                |                                             |
| chr9 qA1         |               | intergenic |                |                                             |
| chr9 qB          | Thsd4         | intron 7   | NM_001040426.1 | thrombospondin type I domain containing 4   |
| chr9 qD          | Hcrtr2        | upstream   | NM_198962.1    | hypocretin (orexin) receptor 2              |
| chr9 qF1         | Ky            | intron 4   | NM_024291.3    | kyphoscoliosis                              |
| chr10 qA1        |               | intergenic |                |                                             |
| chr10 qA4        | Lama2         | intron 1   | NM_008481.2    | laminin alpha 2                             |
| chr10 qB2        |               | intergenic |                |                                             |
| chr10 qB3        | Mcmdc1        | intron 10  | NM_027830.2    | minichromosome maintenance deficient domain |
| chr10 qC2        |               | intergenic |                |                                             |
| chr11 qA5        |               | intergenic |                |                                             |
| chr11 qE1        | Wdr68         | intron 1   | NM_027946.3    | WD-repeat protein                           |
| chr12 qA1        |               | intergenic |                |                                             |
| chr12 qC1        | Npas3         | intron 1   | NM_013780.1    | neuronal PAS domain protein 3               |
| chr12 qE1        | 1700029P11Rik | downstream | NM_025503.1    | hypothetical protein LOC66346               |
| chr13 qD2.1      |               | intergenic |                |                                             |
| chr14 qA2        |               | intergenic |                |                                             |
| chr14 qD3        | Pcdh17        | intron 1   | NM_001013753.1 | protocadherin 17                            |
| chr14 qE2.1      | 4921530L21Rik | downstream | NM_025733.1    | hypothetical protein LOC66732               |
| chr16 qC3.1      | Nrip1         | downstream | NM_173440.1    | nuclear receptor interacting protein 1      |
| chr16 qC3.1      | Robo1         | intron 2   | NM_019413.2    | roundabout homolog 1                        |
| chr17 qA1        | Slc22a3       | intron 1   | NM_011395.1    | solute carrier family 22 (organic cation    |
| chr17 qB1        | Olf128        | upstream   | NM_206816.1    | olfactory receptor 128                      |
| chr17 qB3        | Dscr111       | intron 2   | NM_207649.1    | Down syndrome critical region gene 1-like 1 |
| chr18 qE3        | Zbtb7c        | intron 1   | NM_145356.3    | zinc finger and BTB domain containing 36    |
| chrX qA2         |               | intergenic |                |                                             |
| chrX qE3         |               | intergenic |                |                                             |

Columns indicate, from left to right: chromosomal location of each random genomic control sequence, target gene symbol, RefSeq identifier, and biological function of target genes. Control sequences were obtained from a randomly cloned library of MseI/NarI-restricted, LM-PCR-amplified murine BM DNA. Random genomic sequences were distributed as inside, outside, or at a distance of <30 kb upstream or downstream from known genes (University of California Santa Cruz annotation).

**Table S5. Hematological parameters and erythroid expansion in *th3/th3* long-term hematopoietic chimeras**

| Mouse no. | Donor cells                       | Hb, g/dl    | Hct, %       | RBCs<br>×10 <sup>6</sup> /μl | % BM<br>Ter119 <sup>+</sup><br>cells* | % Splenic<br>Ter119 <sup>+</sup> cells* | VCN |
|-----------|-----------------------------------|-------------|--------------|------------------------------|---------------------------------------|-----------------------------------------|-----|
| 1         | <i>th3/th3</i> <sup>†</sup>       | 3.52 ± 0.50 | 12.64 ± 2.22 | 2.02 ± 0.22                  | 80.10 ± 2.75                          | 90.40 ± 1.75                            | NA  |
|           | <i>th3/+</i> <sup>‡</sup>         | 8.12 ± 0.20 | 33.33 ± 0.65 | 6.90 ± 0.25                  | 51.3 ± 10.55                          | 39.50 ± 10.25                           | NA  |
|           | <i>th3/th3</i><br>LV <sup>§</sup> | 8.6         | 35.01        | 5.9                          | 66                                    | 59                                      | 3.2 |
| 23        | <i>th3/th3</i><br>LV              | 8.1         | 33.54        | 5.3                          | 65                                    | 65                                      | 4.2 |
| 21        | <i>th3/th3</i><br>LV              | 11.9        | 45.36        | 7.2                          | 48                                    | 74                                      | 5.3 |
| 22        | <i>th3/th3</i><br>LV              | 12.2        | 44.04        | 7.2                          | 67                                    | 56                                      | 3.4 |
|           | WT <sup>¶</sup>                   | 13.42 ± 0.5 | 47.80 ± 3.22 | 9.22 ± 0.40                  | 28.5 ± 5.75                           | 3.25 ± 2.50                             | NA  |

NA, not applicable.

\*percentage of Ter119<sup>+</sup> cells, determined by FACS staining after *in silico* gating on mononucleated cells.

<sup>†</sup>Recipients transplanted with mock-transduced *th3/th3* FLCs (*n* = 9). Analysis for this group was performed between 30 and 80 days after-transplant when mice were killed because they were moribund and profoundly anemic.

<sup>‡</sup>Recipients transplanted with mock-transduced *th3/+* FLCs (*n* = 8).

<sup>§</sup>Recipients transplanted with GLOBE-transduced *th3/th3* FLCs.

<sup>¶</sup>Recipients transplanted with mock-transduced normal (WT) FLCs (*n* = 8).



**Table S6. Correction of organ pathology in mice transplanted with GLOBE-transduced FLCs**

| Mouse no. | Donor cells                 | Splenic iron deposits* | Liver EMH <sup>†</sup> | Liver iron deposits* |
|-----------|-----------------------------|------------------------|------------------------|----------------------|
| 1         | <i>th3/th3</i> <sup>‡</sup> | 2/4                    | 2/3                    | 2/4                  |
|           | <i>th3/+</i>                | 2/3                    | 0/3                    | 0/3                  |
|           | <i>th3/th3</i><br>LV        | 2                      | 1                      | 2                    |
| 23        | <i>th3/th3</i><br>LV        | 2                      | 3                      | 2                    |
|           | <i>th3/th3</i><br>LV        | 1                      | 2                      | 0/1                  |
| 22        | <i>th3/th3</i><br>LV        | 2/3                    | 1                      | 0/1                  |
|           | WT                          | 0/2                    | 0/1                    | 0/1                  |

\*The amount of iron deposition was scored semiquantitatively on a scale from 0 (no iron present) to 4 (maximum amount of iron identified in the organ).

<sup>†</sup>The extent of EMH was scored semiquantitatively on a scale from 0 (no EMH present) to 3 (maximum extent of EMH identified in the organ).

<sup>‡</sup>Analyses for this group ( $n = 9$ ) were performed between 30 and 80 days after transplant when mice were killed because they were moribund and profoundly anemic.
